# Supplementary material for: Reproducible 2D Ti3C2Tx for perovskite-based photovoltaic device
Source: Royal Society of Chemistry journal article supplement (doi:10.1039/d2ra08088e), 2023-01-01
Supplement: d2ra08088e1.pdf [file d2ra08088e1.pdf]

## Supporting Information

### Reproducible 2D $\text{Ti}_3\text{C}_2\text{T}_x$ for Perovskite-based Photovoltaic Device

Qingchao Shen\*, Chaoran Chen, Jiao Long, Sali Wang

School of Electronic Information and Electrical Engineering, Anyang Institute of Technology, Avenue West of Yellow River, Anyang 455000, China

Correspondence: Q. S. (email: [shenqingchao6688@ayit.edu.cn](mailto:shenqingchao6688@ayit.edu.cn))

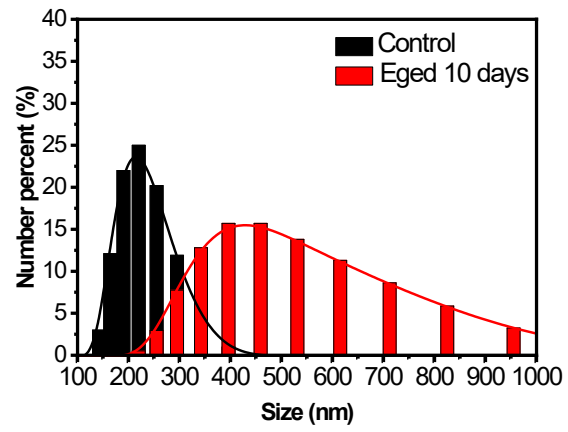

**Figure S1.** The shelf stability of  $\text{Ti}_3\text{C}_2\text{T}_x$  suspension at room temperature.

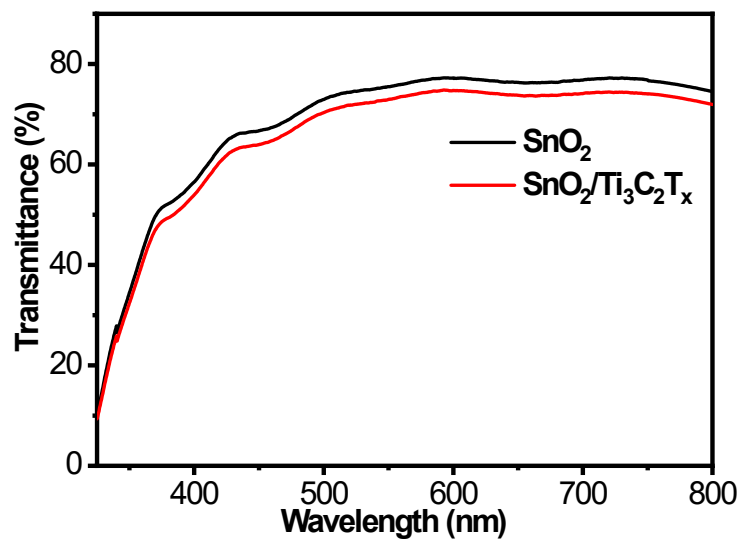

**Figure S2.** The UV-vis transmittance spectra of the electron transport layer with and without passivation.

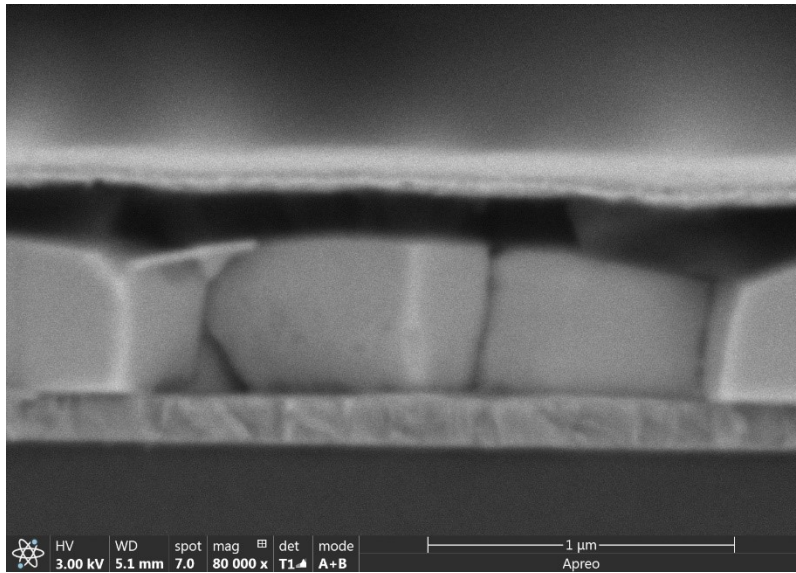

**Figure S3.** The cross-section images of optimal perovskite solar devices.

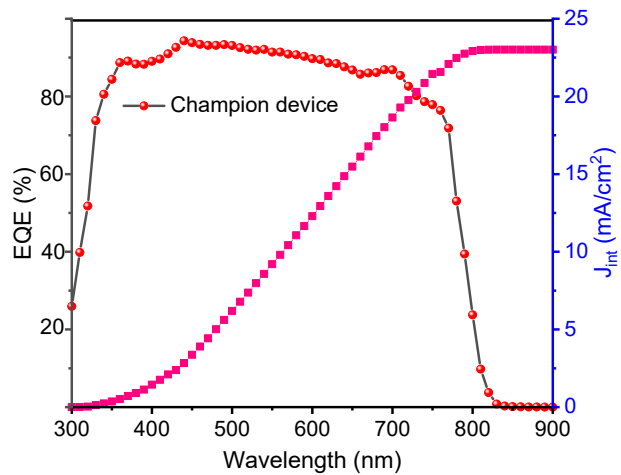

**Figure S4.** EQE spectrum of the optimal solar device.

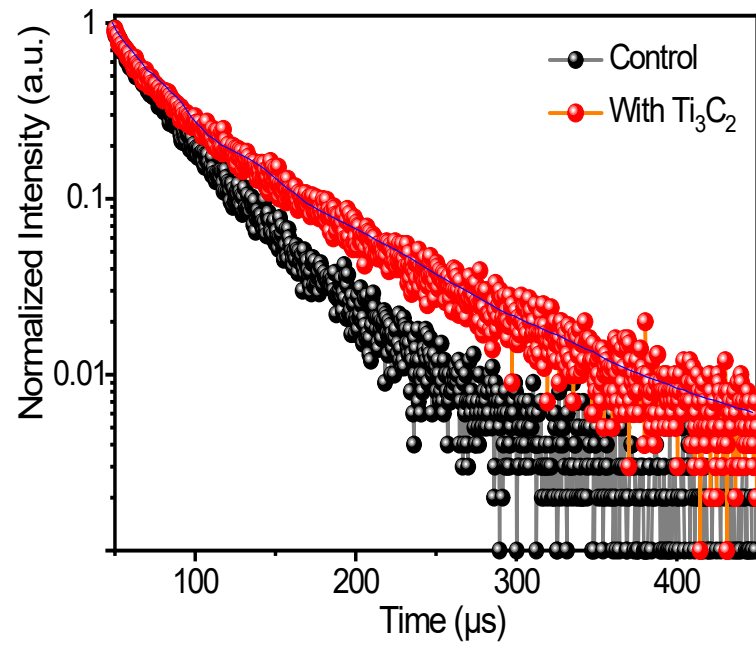

**Figure S5.** The TRPL of control and Ti<sub>3</sub>C<sub>2</sub>-modified perovskite films, respectively.

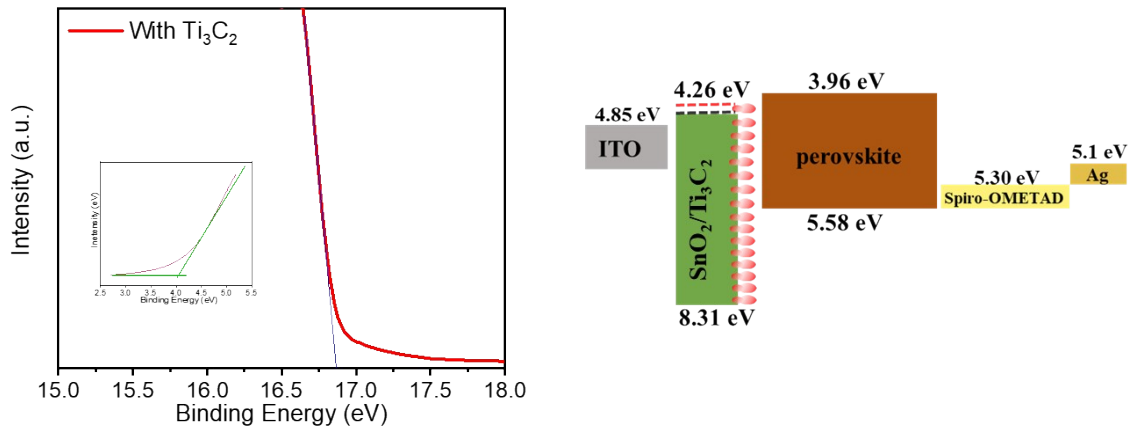

**Figure S6.** The UPS spectrum of Ti<sub>3</sub>C<sub>2</sub>-modified perovskite films and energy alignment in perovskite device, respectively.

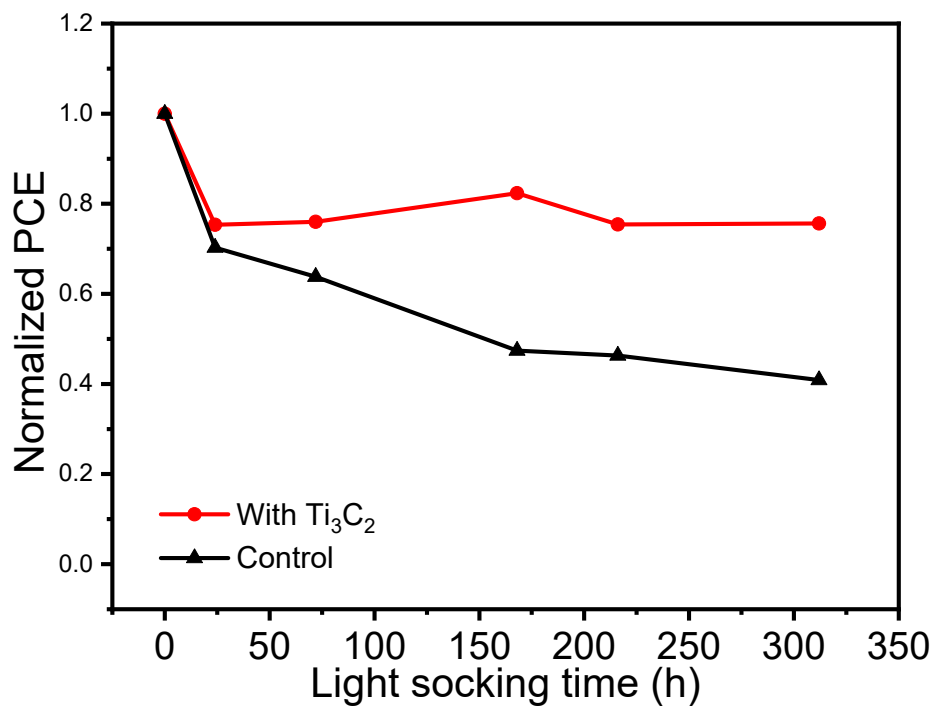

**Figure S7.** The operational stability of champion device under light soaking with LED light source.



**Table S1.** The property of commercial  $\text{Ti}_3\text{AlC}_2$  powder.

| <b>Name</b>               | Formula                   | Color | Formula weight | Density  | -280 mesh | -325 mesh |
|---------------------------|---------------------------|-------|----------------|----------|-----------|-----------|
| Aluminum titanium carbide | $\text{Ti}_3\text{AlC}_2$ | Black | 197.6          | 1.87g/mL | 87.56%    | 34.12%    |

## Equation S1

Fabrication process:

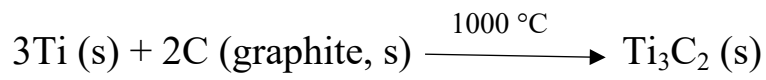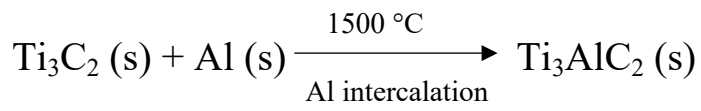

Etching process:

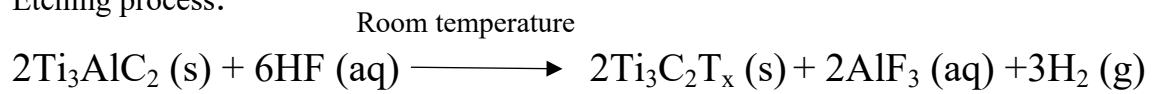

## Equation S2

The crystalline structures of the MXene membranes were characterized by XRD; the d-spacing was calculated using Bragg's law:

$$n\lambda = d \sin 2\theta, \quad (2)$$

where  $n$  is an integer (1, 2, 3...),  $\lambda$  is the wavelength of the X-ray,  $\theta$  is the incident angle and  $d$  is the spacing between the diffraction planes [1]

[1] Nair R. R., Wu H. A., Jayaram P. N., Grigorieva I. V., Geim A. K. Unimpeded permeation of water through helium-leak-tight graphene-based membranes. *Science*, 335, 442-444 (2012).
